# Supplementary material
Source: publisher site journal article supplement (https://www.spandidos-publications.com/5935/downloadSupplementary)
Supplement: Supplementary file 1 [file downloadSupplementary]

**Table SI.** Clinical characteristics and follow-up data of patients with Liddle syndrome carrying *SCNN1B* mutations.

| First author, year                             | Nucleotide change  | Protein change   | Family | Patient | Age at hypertension diagnosis, years | Phenotype    |             |                   |               |              | Follow-up     | Blood pressure, mmHg |           | Serum potassium, mmol/l |           | Note | (Refs.) |
|------------------------------------------------|--------------------|------------------|--------|---------|--------------------------------------|--------------|-------------|-------------------|---------------|--------------|---------------|----------------------|-----------|-------------------------|-----------|------|---------|
|                                                |                    |                  |        |         |                                      | Hypertension | Hypokalemia | Hypoaldosteronism | Hyporeninemia | Complication |               | Baseline             | Follow-up | Baseline                | Follow-up |      |         |
| Liu <i>et al</i> , 2018                        | c.C1690T           | p.Gln564*        | 1      | 1       | <30                                  | Y            | N           | N                 | Y             | Stroke       | 4.2±2.8 years | 167/100              | 130/80    | 3.57                    | 3.85      | -    | (1)     |
| Lu <i>et al</i> , 2022; Qu <i>et al</i> , 2023 | c.1691_1693delinsG | p.Gln564Argfs*29 | 2      | 2       | 23                                   | Y            | Y           | Y                 | Y             | Stroke       | 12 months     | 160/100              | 135/84    | 3.32                    | 4.98      | -    | (2,3)   |
|                                                |                    |                  |        | 3       | 25                                   | Y            | Y           | Y                 | Y             | -            | 12 months     | 178/105              | 132/82    | 2.96                    | 5.20      | -    |         |
|                                                |                    |                  |        | 4       | 24                                   | Y            | Y           | Y                 | Y             | -            | 12 months     | 150/98               | 128/80    | 3.26                    | 4.78      | -    |         |
|                                                |                    |                  |        | 5       | 26                                   | Y            | Y           | N                 | Y             | -            | 12 months     | 155/102              | 126/81    | 3.17                    | 4.65      | -    |         |

|                              |          |               |   |    |     |   |   |   |   |                       |                      |             |        |      |      |   |     |
|------------------------------|----------|---------------|---|----|-----|---|---|---|---|-----------------------|----------------------|-------------|--------|------|------|---|-----|
|                              |          |               |   |    |     |   |   |   |   |                       | hs                   |             |        |      |      |   |     |
|                              |          |               |   | 6  | 34  | Y | N | N | Y | -                     | 12<br>mont<br>hs     | 145/<br>98  | 118/72 | 3.96 | 4.80 | - |     |
|                              |          |               |   | 7  | 38  | Y | Y | N | N | -                     | 12<br>mont<br>hs     | 170/<br>106 | 126/78 | 2.86 | 4.59 | - |     |
|                              |          |               |   | 8  | 17  | Y | Y | N | Y | -                     | 12<br>mont<br>hs     | 170/<br>100 | 116/74 | 2.67 | 4.72 | - |     |
| Liu <i>et al.</i> ,<br>2018  | c.C1696T | p.Arg56<br>6* | 3 | 9  | <30 | Y | Y | N | Y | LV<br>hypertro<br>phy | 4.2±2<br>.8<br>years | 165/<br>90  | 105/70 | 3.06 | 4.15 | - | (1) |
|                              |          |               |   | 10 | <30 | Y | Y | Y | Y | -                     | 4.2±2<br>.8<br>years | 173/<br>98  | 120/80 | 3.21 | 3.76 | - |     |
|                              |          |               |   | 11 | <30 | Y | Y | N | Y | -                     | 4.2±2<br>.8<br>years | 155/<br>90  | 125/70 | 2.90 | 4.30 | - |     |
| Wang <i>et al.</i> ,<br>2015 | c.C1696T | p.Arg56<br>6* | 4 | 12 | 13  | Y | Y | N | Y | -                     | 1<br>mont            | 180/<br>110 | 130/70 | 3.20 | 4.02 | - | (4) |

|                            |          |           |   |    |    |   |   |   |   |                                        | h         |         |              |      |      |                         |     |
|----------------------------|----------|-----------|---|----|----|---|---|---|---|----------------------------------------|-----------|---------|--------------|------|------|-------------------------|-----|
| Polfus <i>et al</i> , 2016 | c.C1696T | p.Arg566* | 5 | 13 | 5  | Y | Y | Y | Y | LV hypertrophy                         | 12 months | 154/97  | Normal       | 3.40 | 3.50 | LV hypertrophy resolved | (5) |
| Cui <i>et al</i> , 2017    | c.C1696T | p.Arg566* | 6 | 14 | 14 | Y | Y | Y | Y | Family history of early mortality      | -         | 190/130 | 120/70       | 2.50 | 4.00 | -                       | (6) |
|                            |          |           | 7 | 15 | 17 | Y | Y | Y | Y | Mother of the patient died of a stroke | -         | 200/120 | 125/70       | 2.90 | 4.00 | -                       |     |
| Gong <i>et al</i> , 2014   | c.C1696T | p.Arg566* | 8 | 16 | 15 | Y | Y | N | N | LV hypertrophy                         | -         | 160/120 | Controllable | 2.86 | -    | -                       | (7) |

|                                    |                        |                       |    |    |    |   |   |   |   |                                                      |                 |                |            |      |      |   |      |
|------------------------------------|------------------------|-----------------------|----|----|----|---|---|---|---|------------------------------------------------------|-----------------|----------------|------------|------|------|---|------|
| Cui <i>et al</i> ,<br>2017         | c.1702C>T              | p.Gln568*             | 9  | 17 | 13 | Y | Y | Y | Y | -                                                    | -               | 160/<br>85     | 135/85     | 2.00 | 3.70 | - | (6)  |
| Brower <i>et al</i> , 2021         | c.1713delC             | p.Tyr571*             | 10 | 18 | 16 | N | Y | Y | Y | -                                                    | 3<br>mont<br>hs | Nor<br>mal     | Norma<br>l | 3.20 | 4.40 | - | (8)  |
| Ding <i>et al</i> ,<br>2019        | c.1721delC             | p.Pro574Hisfs*<br>102 | 11 | 19 | 18 | Y | Y | Y | N | Family<br>history<br>of<br>early-<br>onset<br>stroke | 3<br>years      | 153/<br>102    | 129/69     | 3.40 | 3.60 | - | (9)  |
| Jeunemaitre <i>et al</i> ,<br>1997 | 32 bp nt.<br>1735_1766 | p.Ala579Leufs*<br>4   | 12 | 20 | 28 | Y | Y | Y | Y | Family<br>history<br>of<br>early-<br>onset<br>stroke | 11<br>years     | 168/<br>97     | 128/70     | 3.60 | 4.30 | - | (10) |
|                                    |                        |                       |    | 21 | 21 | Y | Y | Y | Y | -                                                    | 1<br>mont<br>h  | 174/<br>125    | 138/74     | 3.30 | 4.30 | - |      |
|                                    |                        |                       |    | 22 | 19 | Y | Y | Y | Y | -                                                    | 1               | 180/<br>127/80 | 127/80     | 3.50 | 3.80 | - |      |

|                                |                |                          |    |    |    |   |   |   |   |                                                       |            |             |        |      |      |                                                                       |      |
|--------------------------------|----------------|--------------------------|----|----|----|---|---|---|---|-------------------------------------------------------|------------|-------------|--------|------|------|-----------------------------------------------------------------------|------|
|                                |                |                          |    |    |    |   |   |   |   |                                                       | mont<br>h  | 111         |        |      |      |                                                                       |      |
|                                |                |                          |    | 23 | 13 | Y | Y | Y | Y | -                                                     | 1          | 155/<br>100 | 129/81 | 3.30 | 4.10 | -                                                                     |      |
|                                |                |                          |    |    |    |   |   |   |   |                                                       | mont<br>h  | 112         |        |      |      |                                                                       |      |
| Gong <i>et al</i> ,<br>2014    | c.1789dup<br>C | p.Arg59<br>7Profs*<br>11 | 13 | 24 | 15 | Y | Y | Y | Y | Father<br>of the<br>patient<br>died of<br>a<br>stroke | 2<br>years | 160/<br>100 | 135/80 | 1.90 | -    | Died<br>at<br>the<br>age<br>of<br>20<br>year<br>s (no<br>auto<br>psy) | (7)  |
| Inoue <i>et al</i> ,<br>1998   | c.1789dup<br>C | p.Arg59<br>7Profs*<br>11 | 14 | 25 | 15 | Y | Y | Y | Y | -                                                     | -          | 158/<br>62  | 144/80 | 3.20 | 4.20 | -                                                                     | (11) |
| Jackson <i>et al</i> ,<br>1998 | c.1789dup<br>C | p.Arg59<br>7Profs*<br>11 | 15 | 26 | 11 | Y | Y | Y | Y | -                                                     | -          | 142/<br>100 | 110/80 | 3.00 | -    | -                                                                     | (12) |
|                                |                |                          |    | 27 | -  | Y | - | Y | Y | -                                                     | -          | 152/<br>100 | 110/80 | -    | -    | -                                                                     |      |

|                              |                     |                          |    |    |    |   |   |   |   |                                                       |                  |             |            |      |            |   |      |
|------------------------------|---------------------|--------------------------|----|----|----|---|---|---|---|-------------------------------------------------------|------------------|-------------|------------|------|------------|---|------|
|                              |                     |                          |    |    |    |   |   |   |   |                                                       |                  | 59          |            |      |            |   |      |
|                              |                     |                          |    | 28 | -  | Y | Y | Y | Y | -                                                     | -                | 130/<br>94  | 120/86     | 3.70 | -          | - |      |
| Nakano <i>et al</i> , 2002   | c.1789dup<br>C      | p.Arg59<br>7Profs*<br>11 | 16 | 29 | 18 | Y | Y | Y | Y | -                                                     | -                | 198/<br>120 | Norma<br>1 | 2.50 | Norma<br>1 | - | (13) |
| Hiltunen <i>et al</i> , 2002 | c.1800_18<br>01insG | p.Thr60<br>1Aspfs<br>*7  | 17 | 30 | 19 | Y | Y | Y | Y | -                                                     | 12<br>mont<br>hs | 190/<br>120 | 130/95     | 2.40 | 3.80       | - | (14) |
|                              |                     |                          |    | 31 | -  | Y | Y | - | - | -                                                     | 1<br>mont<br>h   | 174/<br>90  | 141/82     | 3.30 | 4.00       | - |      |
| Cui <i>et al</i> , 2017      | c.1806dup<br>G      | p.Pro60<br>3Alafs*<br>5  | 18 | 32 | 17 | Y | Y | N | Y | Mother<br>of the<br>patient<br>died of<br>a<br>stroke | -                | 180/<br>120 | 120/80     | 2.60 | 4.40       | - | (6)  |
|                              |                     |                          | 19 | 33 | 23 | Y | Y | N | Y | Mother<br>of the<br>patient                           | -                | 230/<br>150 | 150/85     | 2.00 | 2.90       | - |      |

|                          |             |                 |    |    |    |   |   |   |   |                                        |         |         |        |      |      |   |      |
|--------------------------|-------------|-----------------|----|----|----|---|---|---|---|----------------------------------------|---------|---------|--------|------|------|---|------|
|                          |             |                 |    |    |    |   |   |   |   | died suddenly at the age of 28 years   |         |         |        |      |      |   |      |
|                          |             |                 |    | 34 | 10 | Y | Y | Y | Y | -                                      | -       | 190/120 | 125/85 | 2.90 | 4.50 | - |      |
| Fan <i>et al.</i> , 2019 | c.1806dup G | p.Pro603Alafs*5 | 20 | 35 | 48 | Y | N | N | N | Father of the patient died of a stroke | 1 month | 220/120 | 140/80 | 4.80 | 5.07 | - | (15) |
|                          |             |                 |    | 36 | 25 | Y | N | Y | N | -                                      | 1 month | 200/130 | 120/80 | 4.38 | 4.50 | - |      |
|                          |             |                 |    | 37 | 36 | Y | Y | N | N | Stroke                                 | 1 month | 200/140 | 123/75 | 3.40 | 4.11 | - |      |
|                          |             |                 |    | 38 | 19 | Y | N | Y | N | -                                      | 1       | 180/    | 140/10 | 3.57 | 5.44 | - |      |

|                      |                |                         |    |    |    |   |   |   |   |       |                  |                |        |      |            |   |   |
|----------------------|----------------|-------------------------|----|----|----|---|---|---|---|-------|------------------|----------------|--------|------|------------|---|---|
|                      |                |                         |    |    |    |   |   |   |   |       | mont<br>h        | 160            | 0      |      |            |   |   |
|                      |                |                         |    | 39 | 16 | Y | N | N | N | -     | 1<br>mont<br>h   | 180/<br>108    | 120/90 | 4.30 | 4.84       | - |   |
|                      |                |                         |    | 40 | 16 | Y | N | Y | Y | -     | 1<br>mont<br>h   | 180/<br>110    | 125/96 | 3.91 | 5.11       | - |   |
|                      |                |                         |    | 41 | 15 | Y | Y | N | N | -     | 1<br>mont<br>h   | 220/<br>150    | 126/88 | 2.40 | 5.30       | - |   |
|                      |                |                         |    | 42 | 3  | Y | Y | Y | Y | -     | 1<br>mont<br>h   | 150/<br>130    | 100/70 | 2.80 | 4.38       | - |   |
| The present<br>study | c.1806dup<br>G | p.Pro60<br>3Alafs*<br>5 | 21 | 43 | 28 | Y | Y | Y | Y | Stoke | 12<br>mont<br>hs | 151/<br>96     | 120/85 | 3.21 | Norma<br>l | - | - |
|                      |                |                         |    | 44 | 18 | Y | Y | N | N | -     | 12<br>mont<br>hs | 160/<br>100    | 128/85 | 2.80 | Norma<br>l | - |   |
|                      |                |                         |    | 45 | 32 | Y | Y | Y | Y | -     | 12               | 167/<br>122/84 | 122/84 | 3.02 | Norma      | - |   |

|                            |            |                          |    |    |    |   |   |   |   |        |                  |                |        |      |            |   |      |
|----------------------------|------------|--------------------------|----|----|----|---|---|---|---|--------|------------------|----------------|--------|------|------------|---|------|
|                            |            |                          |    |    |    |   |   |   |   |        | mont<br>hs       | 103            |        |      | 1          |   |      |
|                            |            |                          |    | 46 | 16 | Y | Y | Y | N | -      | 12<br>mont<br>hs | 200/<br>140    | 125/86 | 3.18 | Norma<br>1 | - |      |
| Fan <i>et al</i> ,<br>2018 | c.1838delC | p.Pro61<br>3Glnfs*<br>63 | 22 | 47 | 50 | Y | N | N | Y | -      | 1<br>mont<br>h   | 180/<br>88     | 130/80 | 4.38 | 4.67       | - | (16) |
|                            |            |                          |    | 48 | 56 | Y | Y | Y | N | -      | 1<br>mont<br>h   | 171/<br>85     | 123/80 | 3.31 | 4.23       | - |      |
|                            |            |                          |    | 49 | 51 | Y | Y | N | Y | -      | 1<br>mont<br>h   | 182/<br>130    | 133/85 | 3.18 | 3.98       | - |      |
|                            |            |                          |    | 50 | 46 | Y | N | N | N | -      | 1<br>mont<br>h   | 153/<br>105    | 120/80 | 3.74 | 4.55       | - |      |
|                            |            |                          |    | 51 | 30 | Y | N | N | Y | -      | 1<br>mont<br>h   | 180/<br>121    | 127/80 | 4.24 | 5.12       | - |      |
|                            |            |                          |    | 52 | 20 | Y | Y | Y | N | Stroke | 1                | 180/<br>130/90 | 130/90 | 3.38 | 4.94       | - |      |

|                            |          |                 |    |    |     |   |   |   |   |                                                   |                |             |        |      |      |   |     |
|----------------------------|----------|-----------------|----|----|-----|---|---|---|---|---------------------------------------------------|----------------|-------------|--------|------|------|---|-----|
|                            |          |                 |    |    |     |   |   |   |   |                                                   | mont<br>h      | 130         |        |      |      |   |     |
|                            |          |                 |    | 53 | 28  | Y | N | Y | Y | -                                                 | 1<br>mont<br>h | 151/<br>110 | 125/83 | 3.88 | 4.73 | - |     |
|                            |          |                 |    | 54 | 20  | Y | Y | N | N | Father<br>of the<br>patient<br>died of<br>a stoke | 1<br>mont<br>h | 220/<br>140 | 130/88 | 2.86 | 5.09 | - |     |
|                            |          |                 |    | 55 | 8   | Y | Y | Y | Y | -                                                 | 1<br>mont<br>h | 122/<br>82  | 115/75 | 3.45 | 4.35 | - |     |
|                            |          |                 |    | 56 | 6   | Y | Y | Y | Y | -                                                 | 1<br>mont<br>h | 141/<br>84  | 110/70 | 2.80 | 3.87 | - |     |
|                            |          |                 |    | 57 | 3   | Y | N | Y | N | -                                                 | 1<br>mont<br>h | 112/5<br>1  | 90/40  | 4.26 | 4.90 | - |     |
| Liu <i>et al</i> ,<br>2018 | c.C1847T | p.Pro61<br>6Leu | 23 | 58 | <30 | Y | Y | Y | Y | -                                                 | 4.2±2<br>.8    | 165/<br>106 | 120/75 | 3.00 | 3.74 | - | (1) |

|                             |          |                 |    |    |     |   |   |   |   |                       |                      |             |        |      |      |   |      |
|-----------------------------|----------|-----------------|----|----|-----|---|---|---|---|-----------------------|----------------------|-------------|--------|------|------|---|------|
|                             |          |                 |    |    |     |   |   |   |   | years                 |                      |             |        |      |      |   |      |
|                             |          |                 |    | 59 | <30 | Y | Y | Y | Y | -                     | 4.2±2<br>.8<br>years | 150/<br>90  | 120/75 | 3.12 | 3.92 | - |      |
|                             |          |                 |    | 60 | <30 | Y | N | N | Y | -                     | 4.2±2<br>.8<br>years | 160/<br>100 | 115/70 | 3.55 | 4.33 | - |      |
|                             |          |                 | 24 | 61 | <30 | Y | N | N | Y | -                     | 4.2±2<br>.8<br>years | 142/<br>96  | 120/80 | 3.76 | 4.42 | - |      |
|                             |          |                 |    | 62 | <30 | Y | Y | N | Y | LV<br>hypertr<br>ophy | 4.2±2<br>.8<br>years | 160/<br>95  | 130/90 | 3.30 | 3.76 | - |      |
|                             |          |                 |    | 63 | <30 | Y | Y | N | Y | -                     | 4.2±2<br>.8<br>years | 155/<br>100 | 115/70 | 3.16 | 3.94 | - |      |
|                             |          |                 | 25 | 64 | <30 | Y | Y | Y | Y | -                     | 4.2±2<br>.8<br>years | 143/<br>89  | 120/85 | 3.27 | 4.09 | - |      |
| Gao <i>et al.</i> ,<br>2013 | c.C1847T | p.Pro61<br>6Leu | 26 | 65 | 21  | Y | Y | N | Y | LV<br>hypertr         | 1<br>mont            | 200/<br>100 | 126/76 | 2.58 | 4.01 | - | (17) |

|  |  |  |  |    |    |   |   |                                                                     |   |   |                |                |        |      |      |   |
|--|--|--|--|----|----|---|---|---------------------------------------------------------------------|---|---|----------------|----------------|--------|------|------|---|
|  |  |  |  |    |    |   |   | ophy<br>and<br>family<br>history<br>of<br>early-<br>onset<br>stroke | h |   |                |                |        |      |      |   |
|  |  |  |  | 66 | 19 | Y | Y | N                                                                   | Y | - | 1<br>mont<br>h | 186/<br>100    | 130/86 | 2.41 | 4.52 | - |
|  |  |  |  | 67 | 15 | Y | Y | N                                                                   | Y | - | 1<br>mont<br>h | 180/<br>110    | 128/80 | 2.64 | 4.71 | - |
|  |  |  |  | 68 | 18 | Y | Y | N                                                                   | Y | - | 1<br>mont<br>h | 166/<br>106    | 136/76 | 2.32 | 3.96 | - |
|  |  |  |  | 69 | 20 | Y | Y | N                                                                   | Y | - | 1<br>mont<br>h | 172/<br>94     | 126/80 | 2.78 | 4.04 | - |
|  |  |  |  | 70 | 18 | Y | Y | N                                                                   | Y | - | 1              | 196/<br>120/80 | 120/80 | 2.78 | 4.05 | - |

|                                |           |                 |    |    |    |   |   |   |   |                                                       |           |             |            |      |            |               |      |
|--------------------------------|-----------|-----------------|----|----|----|---|---|---|---|-------------------------------------------------------|-----------|-------------|------------|------|------------|---------------|------|
|                                |           |                 |    |    |    |   |   |   |   |                                                       | mont<br>h | 120         |            |      |            |               |      |
|                                |           |                 |    | 71 | 14 | Y | Y | N | Y | -                                                     | 1         | 192/<br>120 | 134/78     | 2.46 | 4.01       | -             |      |
|                                |           |                 |    |    |    |   |   |   |   |                                                       | mont<br>h | 120         |            |      |            |               |      |
| Jin <i>et al</i> ,<br>2021     | c.1849C>T | p.Pro61<br>7Ser | 27 | 72 | 17 | Y | Y | N | Y | Father<br>of the<br>patient<br>died of<br>a<br>stroke | -         | 175/<br>125 | 120/70     | 2.95 | 4.00       | -             | (18) |
| Cui <i>et al</i> ,<br>2017     | c.1849C>T | p.Pro61<br>7Ser | 28 | 73 | 15 | Y | Y | Y | Y | -                                                     | -         | 190/<br>120 | 135/75     | 2.90 | 3.80       | -             | (6)  |
| Inoue <i>et al</i> ,<br>1998   | c.1849C>T | p.Pro61<br>7Ser | 29 | 74 | -  | Y | Y | Y | Y | -                                                     | -         | 142/<br>92  | Norma<br>l | 3.40 | Norma<br>l | -             | (19) |
|                                |           |                 |    | 75 | -  | Y | Y | Y | Y | -                                                     | -         | 174/<br>120 | Norma<br>l | 3.50 | Norma<br>l | -             |      |
|                                |           |                 |    | 76 | -  | Y | Y | Y | Y | -                                                     | -         | 160/<br>100 | Norma<br>l | 3.30 | Norma<br>l | -             |      |
| Caretto <i>et al</i> ,<br>2014 | c.1850C>T | p.Pro61<br>7Leu | 30 | 77 | 11 | Y | Y | - | - | Pregna<br>nt                                          | 3<br>mont | 160/<br>110 | 125/85     | -    | -          | Effe<br>ctive | (20) |

|                            |           |             |    |    |    |   |   |   |   |                |    |         |        |      |      |                                          |      |
|----------------------------|-----------|-------------|----|----|----|---|---|---|---|----------------|----|---------|--------|------|------|------------------------------------------|------|
|                            |           |             |    |    |    |   |   |   |   |                | hs |         |        |      |      | control of hypertension during pregnancy |      |
| Rossi <i>et al.</i> , 2011 | c.1850C>T | p.Pro617Leu | 31 | 78 | 17 | Y | N | Y | Y | LV hypertrophy | -  | 167/105 | 128/84 | -    | -    | -                                        | (21) |
|                            |           |             |    | 79 | 18 | Y | N | Y | Y | LV hypertrophy | -  | 150/94  | 122/81 | -    | -    | -                                        |      |
|                            |           |             |    | 80 | 22 | Y | N | Y | Y | LV hypertrophy | -  | 149/86  | 130/76 | -    | -    | -                                        |      |
| Rossi <i>et al.</i> ,      | c.1850C>T | p.Pro61     | 32 | 81 | 16 | Y | Y | Y | Y | LV             | 2  | 164/    | 127/70 | 2.80 | 4.30 | -                                        | (22) |

|                           |                     |                         |    |    |    |   |   |   |   |                                                                                              |                |             |        |      |      |   |      |  |
|---------------------------|---------------------|-------------------------|----|----|----|---|---|---|---|----------------------------------------------------------------------------------------------|----------------|-------------|--------|------|------|---|------|--|
| 2008                      |                     | 7Leu                    |    |    |    |   |   |   |   | hypertr<br>ophy<br>and the<br>grand<br>mother<br>of the<br>patient<br>died of<br>a<br>stroke | years          | 94          |        |      |      |   |      |  |
| Cui <i>et al.</i><br>2017 | c.1848_18<br>49insT | p.Pro61<br>7Serfs*<br>5 | 33 | 82 | 13 | Y | Y | N | Y | -                                                                                            | -              | 212/<br>120 | 135/85 | 3.10 | 3.70 | - | (6)  |  |
| Fan <i>et al.</i><br>2020 | c.1849C>A           | p.Pro61<br>7Tyr         | 34 | 83 | 20 | Y | Y | Y | N | -                                                                                            | 1<br>mont<br>h | 200/<br>150 | 130/80 | 3.01 | 4.43 | - | (23) |  |
|                           |                     |                         |    | 84 | 15 | Y | Y | Y | Y | -                                                                                            | 1<br>mont<br>h | 220/<br>120 | 133/87 | 2.80 | 4.38 | - |      |  |
|                           |                     |                         |    | 85 | 20 | Y | Y | Y | N | -                                                                                            | 1<br>mont      | 180/<br>120 | 126/80 | 3.41 | 4.73 | - |      |  |

|                             |           |                 |    |    |     |   |   |   |   |                                                                                     |                |                |        |      |      |   |      |
|-----------------------------|-----------|-----------------|----|----|-----|---|---|---|---|-------------------------------------------------------------------------------------|----------------|----------------|--------|------|------|---|------|
|                             |           |                 |    |    |     |   |   |   |   |                                                                                     | h              |                |        |      |      |   |      |
|                             |           |                 |    | 86 | 20  | Y | Y | Y | Y | -                                                                                   | 1<br>mont<br>h | 190/<br>130    | 130/80 | 3.12 | 4.66 | - |      |
|                             |           |                 |    | 87 | 22  | Y | Y | Y | N | Stroke<br>and the<br>grand<br>mother<br>of the<br>patient<br>died of<br>a<br>stroke | 1<br>mont<br>h | 220/<br>140    | 125/80 | 2.54 | 3.79 | - |      |
|                             |           |                 |    | 88 | 8   | Y | N | Y | Y | -                                                                                   | 1<br>mont<br>h | 150/<br>100    | 115/70 | 4.15 | 4.76 | - |      |
| Hansson <i>et al</i> , 1995 | c.1853C>T | p.Pro61<br>8Leu | 35 | 89 | 1.5 | Y | Y | Y | Y | -                                                                                   | -              | 140/<br>95     | 115/63 | 2.90 | -    | - | (24) |
|                             |           |                 |    | 90 | 1.5 | Y | Y | Y | Y | -                                                                                   | -              | 130/<br>90     | 122/70 | 3.30 | -    | - |      |
| Gao <i>et al</i> ,          | c.1853C>T | p.Pro61         | 36 | 91 | 18  | Y | Y | Y | Y | Family                                                                              | 16             | 230/<br>110/84 | 110/84 | 2.70 | 4.20 | - | (25) |

|                           |           |             |    |    |    |   |   |   |   |                                                      |      |         |        |      |      |   |      |
|---------------------------|-----------|-------------|----|----|----|---|---|---|---|------------------------------------------------------|------|---------|--------|------|------|---|------|
| 2001                      |           | 8Leu        |    |    |    |   |   |   |   | history of early-onset stroke                        | mont | 140     |        |      |      |   |      |
|                           |           |             |    |    |    |   |   |   |   |                                                      | hs   |         |        |      |      |   |      |
|                           |           |             |    | 92 | 14 | Y | Y | Y | Y | -                                                    | 16   | 170/120 | 132/90 | 2.70 | 4.60 | - |      |
| Tetti <i>et al</i> , 2018 | c.1853C>T | p.Pro618Leu | 37 | 93 | 13 | Y | Y | Y | Y | Father of the patient died from sudden cardiac death | -    | 184/109 | 120/65 | 3.20 | 4.80 | - | (26) |
| Cui <i>et al</i> , 2017   | c.1853C>T | p.Pro618Leu | 38 | 94 | 14 | Y | Y | Y | Y | -                                                    | -    | 185/110 | 125/80 | 3.00 | 4.00 | - | (6)  |
| Wang <i>et al</i> , 2012  | c.1852C>T | p.Pro618Ser | 39 | 95 | 17 | Y | Y | N | Y | -                                                    | -    | 192/120 | 130/70 | 2.68 | 4.10 | - | (27) |
|                           |           |             |    | 96 | 41 | Y | Y | Y | N | -                                                    | -    | 176/    | 120/76 | 3.05 | 3.87 | - |      |

|                                      |           |                 |    |     |    |   |   |   |   |                                                                                                          |                     |             |               |      |               |   |      |
|--------------------------------------|-----------|-----------------|----|-----|----|---|---|---|---|----------------------------------------------------------------------------------------------------------|---------------------|-------------|---------------|------|---------------|---|------|
|                                      |           |                 |    |     |    |   |   |   |   |                                                                                                          |                     | 100         |               |      |               |   |      |
|                                      |           |                 |    | 97  | 25 | Y | Y | N | Y | -                                                                                                        | -                   | 190/<br>120 | 130/70        | 2.68 | 4.35          | - |      |
| Bogdanovi<br><i>ć et al,</i><br>2012 | c.1852C>T | p.Pro61<br>8Ser | 40 | 98  | 13 | Y | N | Y | Y | Brothe<br>r of the<br>patient<br>died<br>from<br>hyperte<br>nsive<br>crisis<br>and LV<br>hypertr<br>ophy | Sever<br>al<br>days | 150/<br>100 | 130/80        | 4.20 | 4.50          | - | (28) |
|                                      |           |                 |    | 99  | 31 | Y | Y | Y | Y | -                                                                                                        | Sever<br>al<br>days | 150/<br>104 | Norma<br>l    | 3.00 | -             | - |      |
| Furuhashi<br><i>et al,</i> 2005      | c.1853C>G | p.Pro61<br>8Arg | 41 | 100 | 26 | Y | Y | Y | Y | -                                                                                                        | 1<br>week           | 160/<br>90  | Decrea<br>sed | 2.90 | Increas<br>ed | - | (29) |
| Ciechanow<br><i>icz et al,</i>       | c.1853C>G | p.Pro61<br>8Arg | 42 | 101 | 8  | Y | Y | Y | Y | -                                                                                                        | 2<br>week           | 155/<br>100 | Norma<br>l    | 2.40 | Norma<br>l    | - | (30) |

|                                   |                |                         |    |     |      |   |   |   |   |                                                      |                      |             |        |      |            |   |      |
|-----------------------------------|----------------|-------------------------|----|-----|------|---|---|---|---|------------------------------------------------------|----------------------|-------------|--------|------|------------|---|------|
| 2005                              |                |                         |    |     |      |   |   |   |   |                                                      | s                    |             |        |      |            |   |      |
| Freundlich<br><i>et al</i> , 2005 | c.1853C>A      | p.Pro61<br>8His         | 43 | 102 | 4    | Y | N | Y | Y | -                                                    | 60<br>mont<br>hs     | 150/<br>90  | 105/63 | 4.10 | Norma<br>1 | - | (31) |
| Yang <i>et al</i> ,<br>2018       | c.1853C>A      | p.Pro61<br>8His         | 44 | 103 | 25   | Y | Y | N | N | Family<br>history<br>of<br>early-<br>onset<br>stroke | 3<br>mont<br>hs      | 180/<br>120 | 100/80 | 3.11 | 4.10       | - | (32) |
|                                   |                |                         |    | 104 | 11   | Y | Y | Y | Y | -                                                    | 3<br>mont<br>hs      | 170/<br>120 | 130/90 | 2.74 | 4.30       | - |      |
|                                   |                |                         |    | 105 | -    | N | Y | Y | Y | -                                                    | 3<br>mont<br>hs      | 130/<br>90  | 100/80 | 3.13 | 4.00       | - |      |
| Liu <i>et al</i> ,<br>2018        | c.1854dup<br>C | p.Asn6<br>19Glnfs<br>*3 | 45 | 106 | < 30 | N | Y | Y | Y | Mild<br>impair<br>ment of<br>renal<br>functio        | 4.2±2<br>.8<br>years | 136/<br>88  | 110/70 | 2.52 | 3.61       | - | (1)  |

|                             |                |                         |    |     |    |   |   |   |   | n                                                    |                |             |        |      |      |   |      |
|-----------------------------|----------------|-------------------------|----|-----|----|---|---|---|---|------------------------------------------------------|----------------|-------------|--------|------|------|---|------|
| Yang <i>et al</i> ,<br>2015 | c.1854dup<br>C | p.Asn6<br>19Glnfs<br>*3 | 46 | 107 | 17 | Y | Y | Y | Y | -                                                    | 1<br>mont<br>h | 160/<br>100 | 110/80 | 3.17 | 4.14 | - | (33) |
| Cui <i>et al</i> ,<br>2017  | c.1854dup<br>C | p.Asn6<br>19Glnfs<br>*3 | 47 | 108 | 15 | Y | Y | Y | Y | Family<br>history<br>of<br>early-<br>onset<br>stroke |                | 200/<br>110 | 130/80 | 3.00 | 3.50 | - | (6)  |

Normal blood pressure range, <140/90 mmHg. Normal serum potassium range, 3.5-5.3 mmol/l. Controllable, blood pressure was under control after precise therapy with epithelial sodium channel blockers (amiloride or triamterene). Y, yes; N, no; LV, left ventricular.

## References

1. Liu K, Qin F, Sun X, et al.: Analysis of the genes involved in Mendelian forms of low-renin hypertension in Chinese early-onset hypertensive patients. *J Hypertens* 36: 502-509, 2018.
2. Lu YT, Liu XC, Zhou ZM, et al.: A Novel Frame-Shift Mutation in SCNN1B Identified in a Chinese Family Characterized by Early-Onset Hypertension. *Front Cardiovasc Med* 9: 896564, 2022.
3. Qu Y, Lu Y, Zhang D, et al.: Identification of a novel frameshift mutation in the SCNN1B causing Liddle syndrome. *Sci Bull (Beijing)* 68: 383-387, 2023.
4. Wang LP, Yang KQ, Jiang XJ, et al.: Prevalence of Liddle Syndrome Among Young Hypertension Patients of Undetermined Cause in a Chinese Population. *J Clin Hypertens (Greenwich)* 17: 902-907, 2015.
5. Polfus LM, Boerwinkle E, Gibbs RA, et al.: Whole-exome sequencing reveals an inherited R566X mutation of the epithelial sodium channel  $\beta$ -subunit in a case of early-onset phenotype of Liddle syndrome. *Cold Spring Harb Mol Case Stud* 2: a001255, 2016.
6. Cui Y, Tong A, Jiang J, Wang F and Li C: Liddle syndrome: clinical and genetic profiles. *J Clin Hypertens (Greenwich)* 19: 524-529, 2017.
7. Gong L, Chen J, Shao L, Song W, Hui R and Wang Y: Phenotype-genotype analysis in two Chinese families with Liddle syndrome. *Mol Biol Rep* 41: 1569-1575, 2014.
8. Brower RK, Ghlichloo IA, Shabgahi V, Elsholz D, Menon RK and Vyas AK: Liddle Syndrome due to a Novel c.1713 Deletion in the Epithelial Sodium Channel  $\beta$ -Subunit in a Normotensive Adolescent. *AACE Clin Case Rep* 7: 65-68, 2021.
9. Ding X, Jia N, Zhao C, et al.: A family with Liddle's syndrome caused by a new c.1721 deletion mutation in the epithelial sodium channel  $\beta$ -subunit. *Exp Ther Med* 17: 2777-2784, 2019.
10. Jeunemaitre X, Bassilana F, Persu A, et al.: Genotype-phenotype analysis of a newly discovered family with Liddle's syndrome. *J Hypertens* 15: 1091-1100, 1997.
11. Inoue T, Okauchi Y, Matsuzaki Y, et al.: Identification of a single cytosine base insertion mutation at Arg-597 of the beta subunit of the human epithelial sodium channel in a family with Liddle's disease. *Eur J Endocrinol* 138: 691-697, 1998.
12. Jackson SN, Williams B, Houtman P and Trembath RC: The diagnosis of Liddle syndrome by identification of a mutation in the beta subunit of the epithelial sodium channel. *J Med Genet* 35: 510-512, 1998.
13. Nakano Y, Ishida T, Ozono R, et al.: A frameshift mutation of beta subunit of epithelial sodium channel in a case of isolated Liddle syndrome. *J Hypertens* 20: 2379-2382, 2002.
14. Hiltunen TP, Hannila-Handelberg T, Petäjaniemi N, et al.: Liddle's syndrome associated with a point mutation in the extracellular domain of the epithelial sodium channel gamma subunit. *J Hypertens* 20: 2383-2390, 2002.
15. Fan P, Lu CX, Yang KQ, et al.: Truncated Epithelial Sodium Channel  $\beta$  Subunit Responsible for Liddle Syndrome in a Chinese Family. *Kidney Blood Press Res* 44: 942-949, 2019.
16. Fan P, Lu CX, Zhang D, et al.: Liddle syndrome misdiagnosed as primary aldosteronism resulting from a novel frameshift mutation of SCNN1B. *Endocr Connect* 7: 1528-1534, 2018.
17. Gao L, Wang L, Liu Y, Zhou X, Hui R and Hu A: A family with Liddle syndrome caused by a novel missense mutation in the PY motif of the beta-subunit of the epithelial sodium channel. *J Pediatr* 162: 166-170, 2013.
18. Jin Y, Qiu W and Yao J: Liddle syndrome: A case report. *Med Clin (Barc)* 2021.
19. Inoue J, Iwaoka T, Tokunaga H, et al.: A family with Liddle's syndrome caused by a new missense mutation in the beta subunit of the epithelial sodium channel. *J Clin Endocrinol Metab* 83: 2210-2213, 1998.
20. Caretto A, Primerano L, Novara F, Zuffardi O, Genovese S and Rondinelli M: A Therapeutic Challenge: Liddle's Syndrome Managed with Amiloride during Pregnancy. *Case Rep Obstet Gynecol* 2014: 156250, 2014.
21. Rossi E, Farnetti E, Nicoli D, et al.: A clinical phenotype mimicking essential hypertension in a newly discovered family with Liddle's syndrome. *Am J Hypertens* 24: 930-935, 2011.
22. Rossi E, Farnetti E, Debonneville A, et al.: Liddle's syndrome caused by a novel missense mutation (P617L) of the epithelial sodium channel beta subunit. *J Hypertens* 26: 921-927, 2008.
23. Fan P, Zhang D, Pan XC, et al.: Premature Stroke Secondary to Severe Hypertension Results from Liddle Syndrome Caused by a Novel SCNN1B Mutation. *Kidney Blood Press Res* 45: 603-611, 2020.

24. Hansson JH, Schild L, Lu Y, et al.: A de novo missense mutation of the beta subunit of the epithelial sodium channel causes hypertension and Liddle syndrome, identifying a proline-rich segment critical for regulation of channel activity. *Proc Natl Acad Sci U S A* 92: 11495-11499, 1995.
25. Gao PJ, Zhang KX, Zhu DL, et al.: Diagnosis of Liddle syndrome by genetic analysis of beta and gamma subunits of epithelial sodium channel--a report of five affected family members. *J Hypertens* 19: 885-889, 2001.
26. Tetti M, Monticone S, Burrello J, et al.: Liddle Syndrome: Review of the Literature and Description of a New Case. *Int J Mol Sci* 19, 2018.
27. Wang LP, Gao LG, Zhou XL, et al.: Genetic diagnosis of Liddle's syndrome by mutation analysis of SCNN1B and SCNN1G in a Chinese family. *Chin Med J (Engl)* 125: 1401-1404, 2012.
28. Bogdanović R, Kuburović V, Stajić N, et al.: Liddle syndrome in a Serbian family and literature review of underlying mutations. *Eur J Pediatr* 171: 471-478, 2012.
29. Furuhashi M, Kitamura K, Adachi M, et al.: Liddle's syndrome caused by a novel mutation in the proline-rich PY motif of the epithelial sodium channel beta-subunit. *J Clin Endocrinol Metab* 90: 340-344, 2005.
30. Ciechanowicz A, Dolezel Z, Placha G, et al.: Liddle syndrome caused by P616R mutation of the epithelial sodium channel beta subunit. *Pediatr Nephrol* 20: 837-838, 2005.
31. Freundlich M and Ludwig M: A novel epithelial sodium channel beta-subunit mutation associated with hypertensive Liddle syndrome. *Pediatr Nephrol* 20: 512-515, 2005.
32. Yang KQ, Lu CX, Fan P, et al.: Genetic screening of SCNN1B and SCNN1G genes in early-onset hypertensive patients helps to identify Liddle syndrome. *Clin Exp Hypertens* 40: 107-111, 2018.
33. Yang KQ, Lu CX, Xiao Y, et al.: A novel frameshift mutation of epithelial sodium channel  $\beta$ -subunit leads to Liddle syndrome in an isolated case. *Clin Endocrinol (Oxf)* 82: 611-614, 2015.
